# Supplementary material for: Does a Red House Affect Rhythms in Mice with a Corrupted Circadian System?
Source: Int J Mol Sci. 2021 Feb 25;22(5):2288. doi: 10.3390/ijms22052288 (PMC7956239; doi:10.3390/ijms22052288)
Supplement: Supplementary file 1 [file ijms-22-02288-s001.pdf]

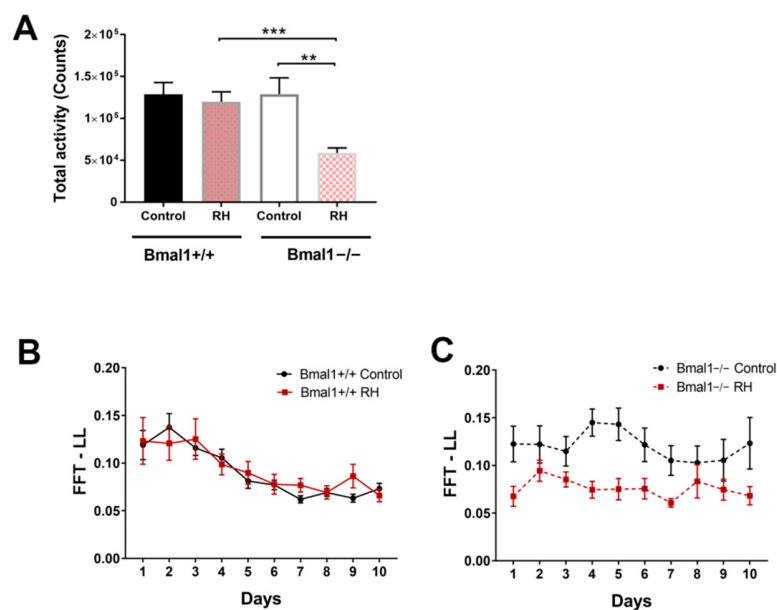

Suppl. Fig1. (A) Quantitative analysis of total spontaneous locomotor activity counts during constant light (LL). \*\*:  $p < 0.01$ , \*\*\*:  $p < 0.001$ . The power of the 24 h phase was analyzed by fast Fourier transformation (FFT) in (B) Bmal1<sup>+/+</sup> and (C) Bmal1<sup>-/-</sup> without (black) and with (red) RH during the first 10 days after transition to LL. The area under the curve in Bmal1<sup>-/-</sup> mice with RH is significantly smaller than in the Bmal1<sup>-/-</sup> control group ( $p < 0.001$ ).
